# Supplementary material for: Isolation and Characterization of a Double Stranded DNA Megavirus Infecting the Toxin-Producing Haptophyte Prymnesium parvum
Source: MDPI journal article supplement (doi:10.3390/v9030040), 2017-03-09
Supplement: s1 [file s1]

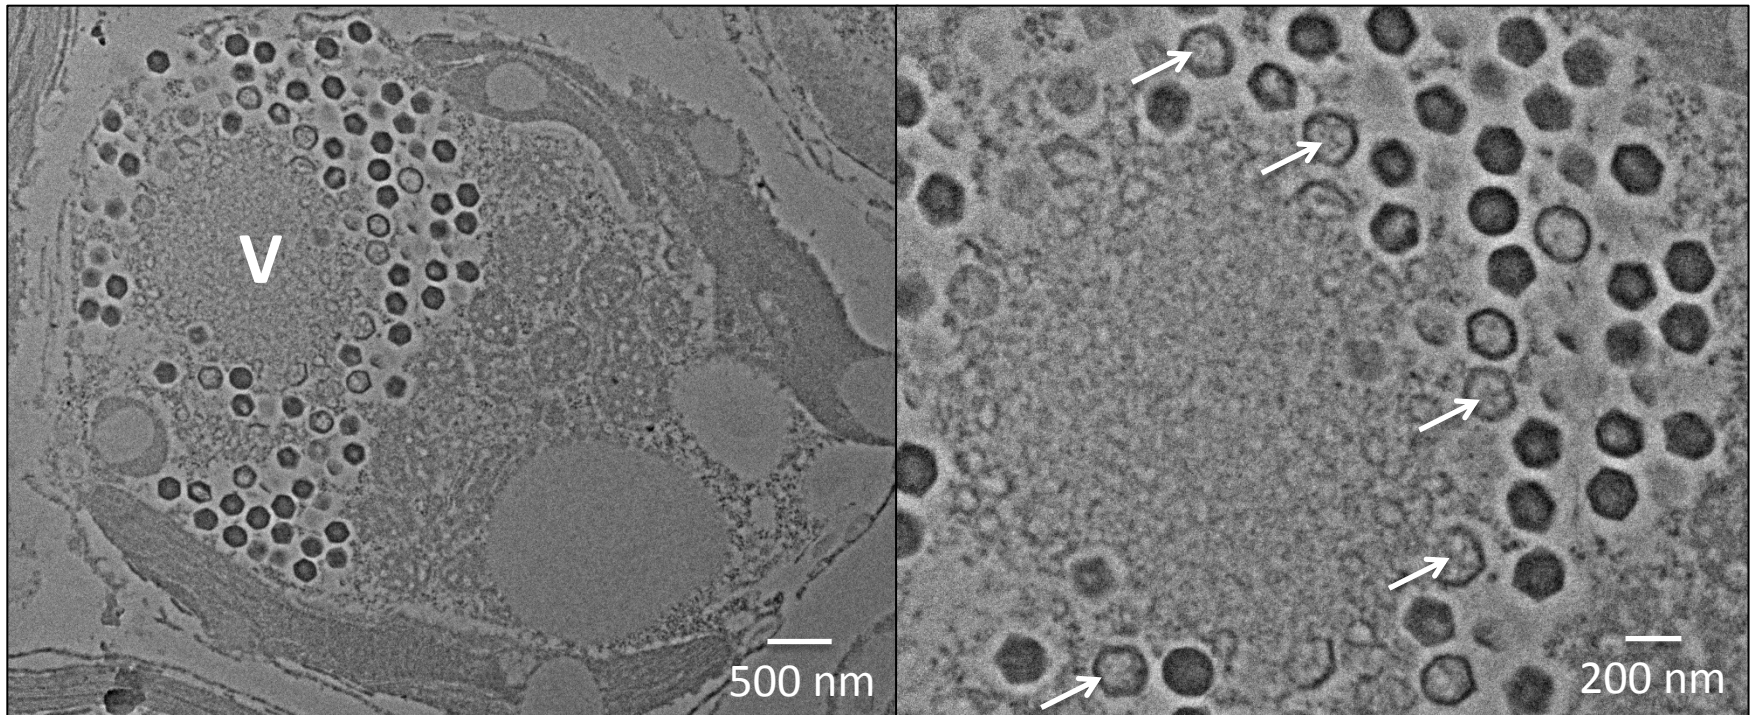

**SI Figure 2.** Electron micrographs of infected *P. parvum* 946/6 48 hpi. Left – Whole cell visually infected with many PpDNAV particles surrounding a viroplasm. Right – Magnified from left. Both mature and immature particles can be observed. ‘Empty’ particles are denoted by a white arrow. V – viroplasm.
