# Supplementary material for: Isolation and Characterization of a Double Stranded DNA Megavirus Infecting the Toxin-Producing Haptophyte Prymnesium parvum
Source: MDPI journal article supplement (doi:10.3390/v9030040), 2017-03-09
Supplement: s1 [file s1]

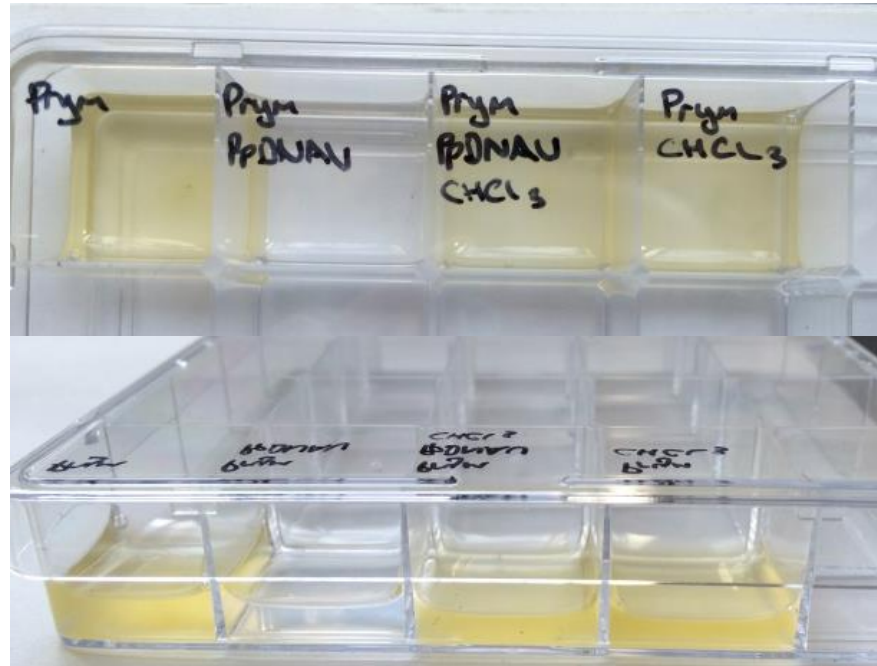

**SI Figure 3.** Chloroform sensitivity assay. Left to right – *P. parvum* 946/6 + f/2 media; *P. parvum* 946/6 + PpDNAV; *P. parvum* 946/6 + Chloroform treated PpDNAV; *P. parvum* 946/6 + Chloroform treated f/2 media.
