# Supplementary material for: Isolation and Characterization of a Double Stranded DNA Megavirus Infecting the Toxin-Producing Haptophyte Prymnesium parvum
Source: MDPI journal article supplement (doi:10.3390/v9030040), 2017-03-09
Supplement: s1 [file s1]

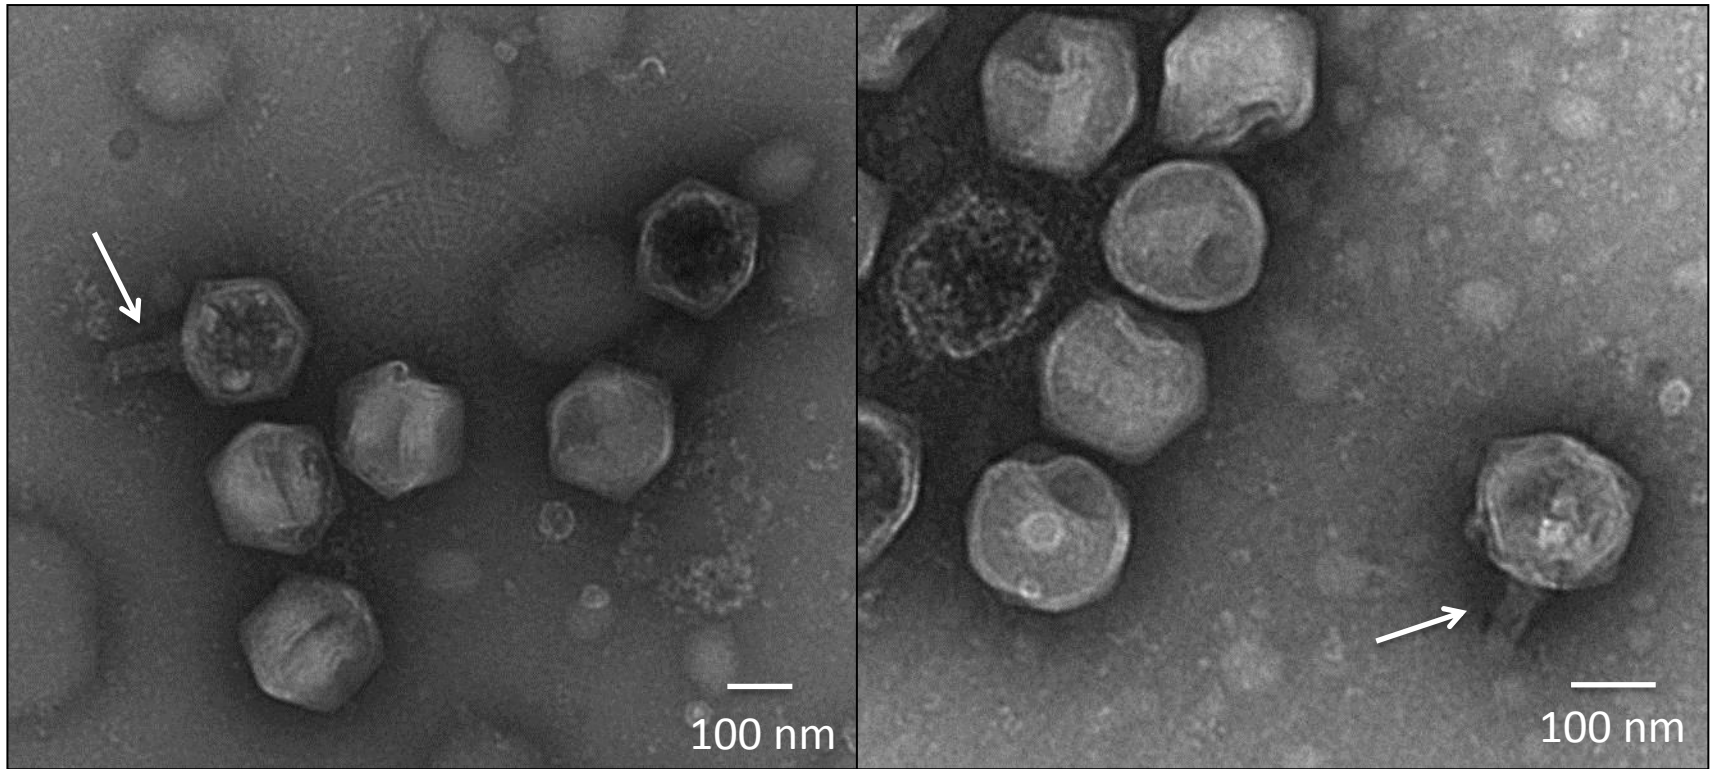

**SI Figure 1.** Electron micrographs of negatively stained PpDNAV particles. A small number of particles appear to have a single imperfect vertex, likely representing a stargate structure (white arrow).
