# Supplementary material for: Isolation and Characterization of a Double Stranded DNA Megavirus Infecting the Toxin-Producing Haptophyte Prymnesium parvum
Source: Viruses. 2017 Mar 9;9(3):40. doi: 10.3390/v9030040 (PMC5371795; doi:10.3390/v9030040)
Supplement: Supplementary file 1 [file viruses-09-00040-s001.zip]

Archive with 4 entries (4 files):
- supplementary revised/SI Figure 1.pdf
- supplementary revised/SI Figure 2.pdf
- supplementary revised/SI Figure 3.pdf
- supplementary revised/SI Figure 4.pdf
